# Supplementary material for: Replication of Influenza A Virus in Secondary Lymphatic Tissue Contributes to Innate Immune Activation
Source: MDPI journal article supplement (doi:10.3390/pathogens10050622), 2021-05-19
Supplement: s1 [file s1]

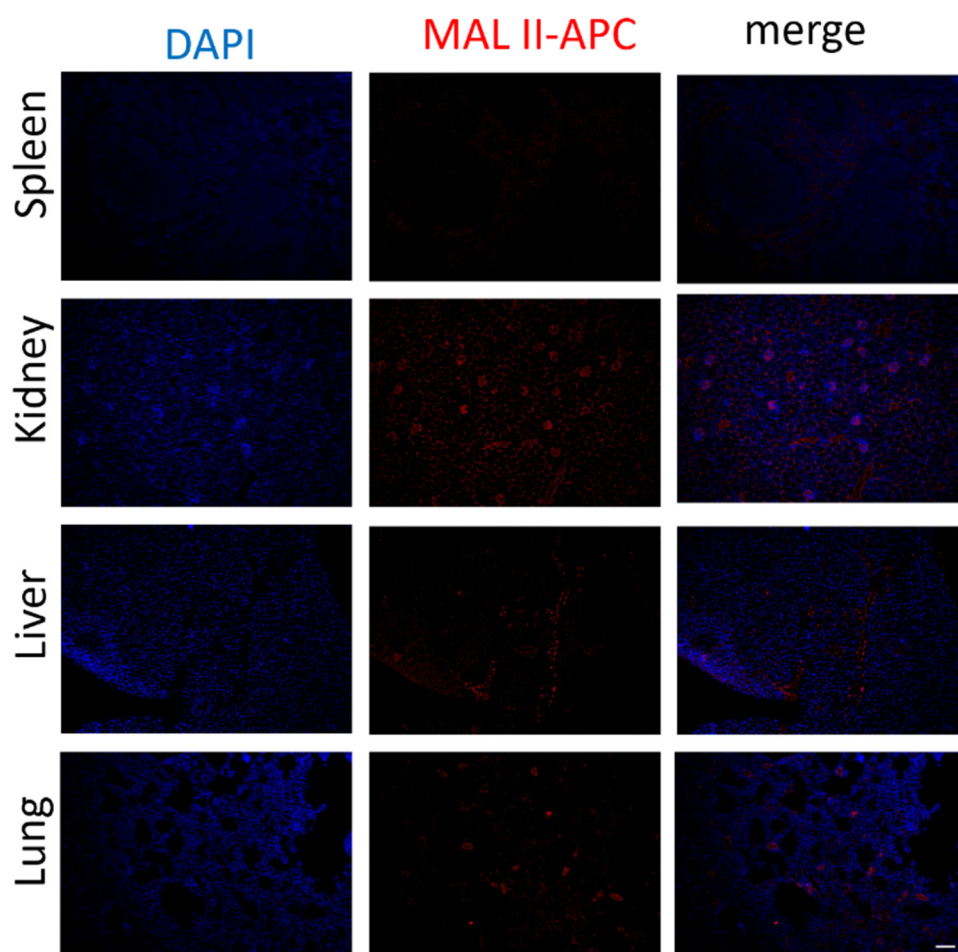

**Supplementary Figure S1.** Expression of Sialic acid on different organs. Representative immunofluorescence of spleen, kidney, liver and lung histological sections from B6/7J murine models stained for sialic acid. One slide, representative of four, is shown. Scale bar, 100  $\mu$ m.
